# Supplementary material for: Nanoscale interfacial electroactivity in PVDF/PVDF-TrFE blended films with enhanced dielectric and ferroelectric properties
Source: Royal Society of Chemistry journal article supplement (doi:10.1039/c7tc00162b), 2017-01-01
Supplement: c7tc00162b1.pdf [file c7tc00162b1.pdf]

## **SUPPORTING INFORMATION FOR:**

### **Nanoscale Interfacial Electroactivity in PVDF/PVDF-TrFE Blended Films with Enhanced Dielectric and Ferroelectric Properties**

**Nan Meng, Xiaojing Zhu, Rui Mao, Michael John Reece and Emiliano  
Bilotti\***

School of Engineering and Materials Science,

Queen Mary University of London, Mile End Road, E1 4NS, UK

\*E-mail: [e.bilotti@qmul.ac.uk](mailto:e.bilotti@qmul.ac.uk)

Telephone: +44 (0)20 7882 7575

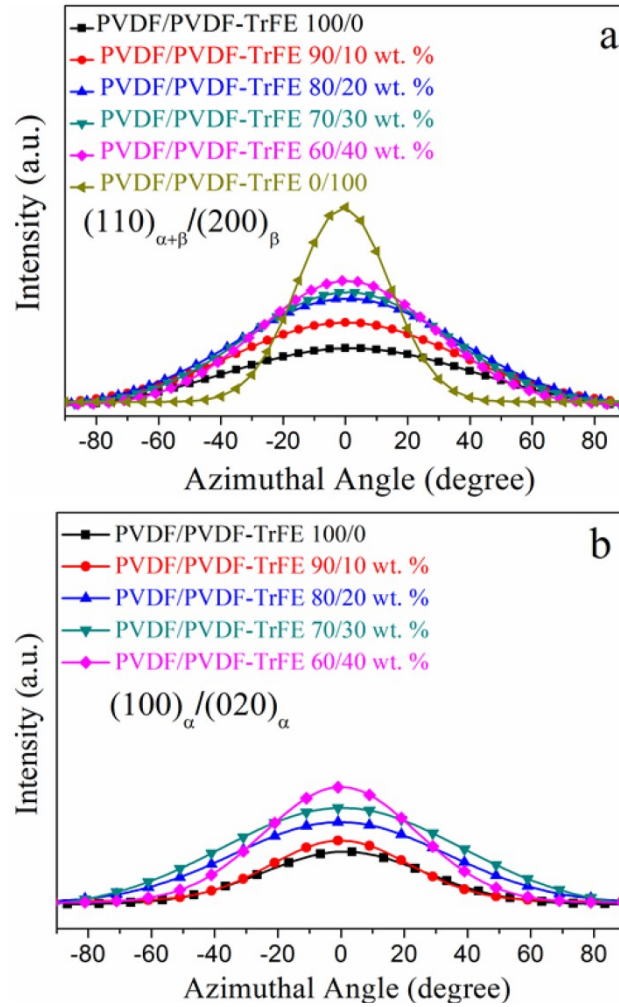

**Figure S1.** Intensity as a function of azimuthal angle at the radial position of: (a)  $(110)_{\alpha+\beta}/(200)_{\beta}$  of pure PVDF, PVDF-TrFE and blended films; (b)  $(100)_{\alpha}/(020)_{\alpha}$  of pure PVDF and blended films. The pure PVDF film shows the least preferred orientation, corresponding to the broadest peak in Figure S1. For the blended films, the intensity is enhanced and the peak becomes sharper with increasing amount of PVDF-TrFE, which shows that blending with PVDF-TrFE leads to increased crystallinity and higher preferred orientation for the PVDF/PVDF-TrFE blended films.

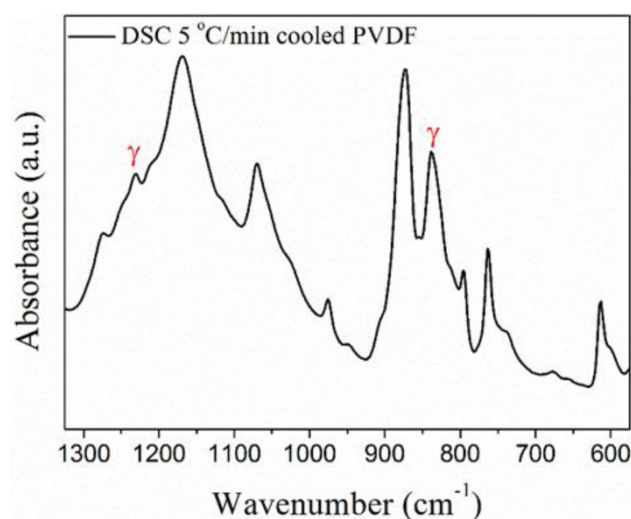

**Figure S2.** FTIR data for PVDF crystallized during DSC cooling, indicating the formation of  $\gamma$ -phase.

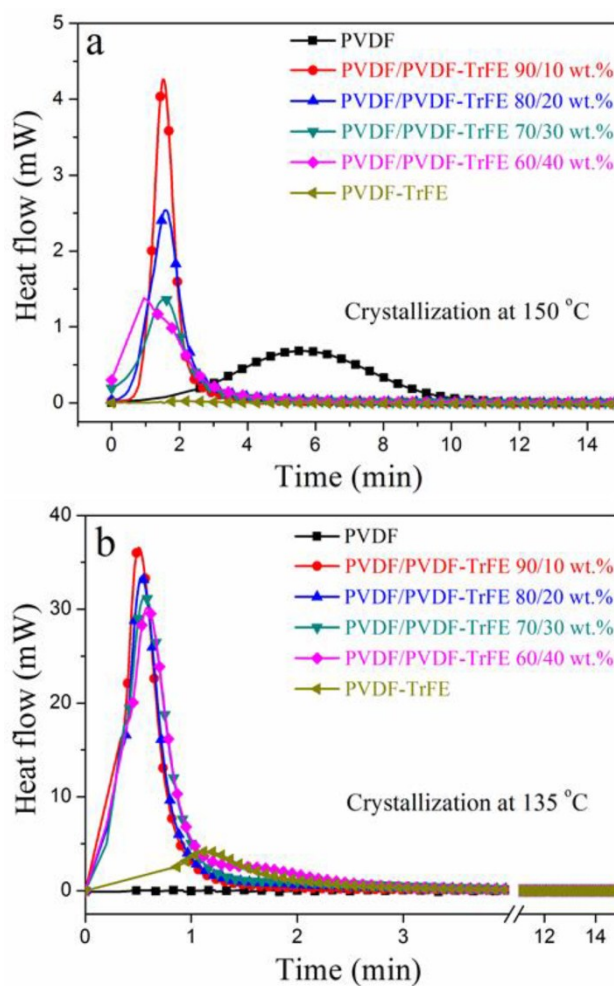

**Figure S3.** DSC heat flow as a function of time recorded during isothermal crystallization at (a) 150 °C and (b) 135 °C.
